# Supplementary material for: Molecularly imprinted polymersviareversible addition–fragmentation chain-transfer synthesis in sensing and environmental applications
Source: Royal Society of Chemistry journal article supplement (doi:10.1039/d2ra00232a), 2022-01-01
Supplement: d2ra00232a1.pdf [file d2ra00232a1.pdf]

## Appendix A

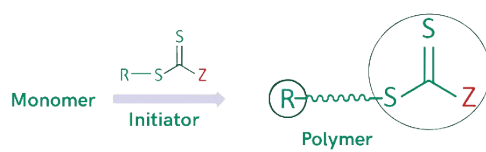

Fig. S1 RAFT initiator control in chain growth over polymerization.

---

Modified from Sigma Aldrich Copyright, RAFT polymerization products.

**Table S1.** Summary of Molecularly Imprinted Polymer Reviews in analytical applications.

| Application                                             | Scope                                                                                                 | Review Study Topic                                                                             | Experimental Approach                                                                                                            | Ref. |
|---------------------------------------------------------|-------------------------------------------------------------------------------------------------------|------------------------------------------------------------------------------------------------|----------------------------------------------------------------------------------------------------------------------------------|------|
| Biosensors                                              | Electrochemical biosensors for infectious diseases                                                    | MIP as artificial receptors for the detection of infectious diseases                           | Mechanisms of recognition events between MIP biomarkers.                                                                         | [53] |
|                                                         | Polymer brushes for drug delivery, biosensing, stimuli responsive and proton conducting               | Polymeric structures as selective and responsive to specific stimuli                           | Implementation of Controlled Radical Polymerization for brushes synthesis                                                        | [93] |
|                                                         | MIP as sorbents for organic pollutants in wastewater and its treatment                                | MIP Composites for wastewater treatment                                                        | Synthetic route for Core-Shell and CNT composites                                                                                | [47] |
| Environmental monitoring                                | Experimental conditions for HNT@MIPs microcapsules                                                    | Novel material for analytical and environmental monitoring                                     | Hydroponics wastewater treatment                                                                                                 | [3]  |
|                                                         | MIP-sensor based on: SW/MW-CNT with NPs, Graphene, Graphene/NPs, GO, rGO, CNT/GO/Graphene QDs         | MIP and carbon nanomaterials for analytical sensing                                            | Optimization of experimental parameters for sensing                                                                              | [40] |
|                                                         | Capacitive, CHEMFET, and Fluorescence Quenching Sensing MIPs.                                         | Overview of MIP, from general concepts to Computational modelling                              | Integration of MIPs as transducers for sensor development                                                                        | [30] |
|                                                         | Heavy Metal Ions Adsorption Capacity, Detection Limit and of Kinetic Models for Adsorption Isotherms  | Principles and techniques of MIPs in the elimination of heavy metal ions                       | Study of adsorption capacities and reusability for toxicity removal                                                              | [94] |
|                                                         | Synthesis in supercritical carbon dioxide (scCO <sub>2</sub> ).                                       | Green approaches to MIP development, from nano- to micron-scale applications.                  | Improve MIP properties (morphology, homogeneity of binding sites)                                                                | [52] |
|                                                         | MIP as dual/multi responsive material in solid-phase extraction, electrodes, and fluorescence sensors | Application of MIP in microextraction, sorption, and biosensors                                | MIP for in situ analysis of organic and inorganic pollutants                                                                     | [25] |
|                                                         | N/A                                                                                                   | Developments and applications for solid-phase extraction and quantification in complex samples | MIP implementation an extraction material                                                                                        | [79] |
| Molecular Imprinting: Green Perspectives and Strategies | Implementation process of green chemistry in MIT: GREENIFICATION                                      | Assistance of upgraded instrumentation in deploying greener goals                              | [151]                                                                                                                            |      |
| Polymer Science                                         | Specific surface area for MIPs and NIPs                                                               | Control over imprinting effect                                                                 | Determining IP, Pore size distribution of MIP, and NIP                                                                           | [49] |
|                                                         | Solvent adjustment in MIP-SPE structure, MIP applications ins MIP                                     | MIP synthesis and strategy for pollutants analysis                                             | Optimization of experimental parameters in microextraction                                                                       | [24] |
|                                                         | N/A                                                                                                   | Improving polymerization control to achieve a homogenous network                               | Design surface modified and uniform MIP nanoparticles                                                                            | [43] |
|                                                         | Analytical chemistry                                                                                  | Polymers in analytical science with specific molecular architecture and composition            | Functional interfaces by CRP approach for analytical applications.                                                               | [72] |
|                                                         | Thermodynamic parameters for MIPs.                                                                    | Intermolecular interactions between the template and the functional monomer.                   | Analysis of frontier molecular orbitals, electrostatic potentials, and Fukui functions to identify the most stable complex site. | [42] |
|                                                         | N/A                                                                                                   | Fine tuning and functionalization of MIP's surface with RAFT fragments.                        | Protocol to synthesize superparamagnetic MIP using a RAFT polymerization                                                         | [95] |
|                                                         | Imprinting methods, templates, and characterization. Comparison of bulk and nanostructured MIP.       | Perspectives and applications, of novel preparation technologies and strategies                | MIP synthesis strategies for advanced polymer technology                                                                         | [46] |

**Table S2.** RAFT-MIP works for ion detection review.

| Monomer [M]         | RAFT Agent [A] | Initiator [I] | [M]:[A]:[I] | Time (hrs) | Material Support               | Reference |
|---------------------|----------------|---------------|-------------|------------|--------------------------------|-----------|
| Methyl methacrylate | CPADB          | CdSe QDs      | 200:01:05   | 24         | QDs                            | [97]      |
| Methacrylic acid    | TTCA           | AIBN          | 55:05:01    | 8          | Fe <sub>3</sub> O <sub>4</sub> | [109]     |
| Methacrylic acid    | DBTTC          | AIBN          | 100:02:01   | 24         | –                              | [113]     |
| Methyl methacrylate | BDAAT          | AIBN          | 20:03:01    | 3.5        | Graphene Oxide                 | [98]      |

**Table S3.** Monomer and Controlled Radical Polymerization Type reported in MIP analytical applications. Modified from refs. <sup>36,47,56</sup>

| Monomer                                                                        | Abbreviation | CRP employed | Applications                                            | Reference |
|--------------------------------------------------------------------------------|--------------|--------------|---------------------------------------------------------|-----------|
| Cellulose 2,3-bis (3,5- dimethyl phenyl carbamate)-6- acrylate                 | MON-1        | ATRP         | Stationary phase for HPLC                               |           |
| Cellulose 2,3-bis (3,5- dimethyl phenyl carbamate)-6- acrylate                 | MON-1        | ATRP         | Stationary phase for HPLC                               |           |
| 1-Vinylimidazole                                                               | MON-2        | ATRP         | Stationary phase for HILIC                              |           |
| 2-hydroxyl-3-[4-(hydroxymethyl)-1H-1,2,3-triazol-1-yl] propyl 2-methylacrylate | HTMA         | ATRP         | Stationary phase for HILIC                              |           |
| N-isopropylacrylamide                                                          | IPAAm        | ATRP         | Thermoresponsive stationary phase for HPLC              |           |
| 3-Sulfopropyl methacrylate potassium                                           | SPM          | ATRP         | Cation exchange stationary phase for HPLC               | [34]      |
| Divinylbenzene                                                                 | DVB          | ATRP         | Stationary phase for HPLC                               |           |
| Butyl methacrylate                                                             | BMA          | ATRP         |                                                         |           |
| N, N-dimethyl-N- methacryloyloxyethyl-N-(3-sulfopropyl) ammonium betaine       | MON-3        | ATRP         | Membrane for protein binding, stationary phase for HPLC |           |
| 2-(2-methoxy ethoxy) ethyl methacrylate                                        | MEO2MA       | ATRP         | Thermoresponsive monolith for HPLC                      |           |
| 4-Vinylpyridine                                                                | 4-VP         | ATRP         | MIP for selective adsorption                            |           |
| N-tert-butylacrylamide                                                         | tBAAm        | ATRP         | Thermo-responsive stationary phase for HPLC             |           |
| Acrylamide                                                                     | Aam          | ATRP         | MIP for selective adsorption                            |           |
| Ethylene glycol methacrylate phosphate                                         | EGMP         | ATRP         | MIP for selective adsorption                            |           |
| m-aminophenylboronic acid                                                      | APBA-PA      | ATRP         | Fabricating fluorescent sensor                          |           |
| Ethylene glycol dimethacrylate                                                 | EGDMA        | ATRP, RAFT   | Stationary phase for HPLC                               | [47]      |
| Glycidyl methacrylate                                                          | GMA          | ATRP, RAFT   | Restricted access stationary phase for HPLC             |           |
| Hydroxyethyl methacrylate                                                      | HEMA         | ATRP, RAFT   | RAM for HPLC                                            |           |
| Methacrylic acid                                                               | MAA          | RAFT         | MIP for selective adsorption                            |           |
| N, N'-methylenebis (ACRYLAMIDE)                                                | MBA          | RAFT         | MIP for selective adsorption                            |           |
| 4-((4-Methacryloyloxy)- phenyl azo) benzoic acid                               | MPABA        | RAFT         | MIP for selective adsorption                            |           |
| 2-(Dimethylamino)ethyl methacrylate                                            | DMAEMA       | RAFT         | Thermo- and pH-responsive surfaces                      | [56]      |
| 2,6-bis(acrylamido)pyridine                                                    | BAAPy        | RAFT         | MIP for chiral separation                               |           |
| N, N-Dimethylacrylamide                                                        | DMA          | RAFT         | Fabricating fluorescent sensor                          |           |

**Table S4.** MIP for ion detection review

| Functional monomer | Crosslinking agent | Initiator         | Max adsorption capacity | Detected Ion                 | Limit of detection (sensor) | Reference |
|--------------------|--------------------|-------------------|-------------------------|------------------------------|-----------------------------|-----------|
| Allyl Thiourea     | EGDMA              | AIBN              | 5.08 mg/g               | As <sup>3+</sup>             | -                           | [128]     |
| VA                 | Glutaraldehyde     | NaNO <sub>2</sub> | -                       | NO <sub>2</sub> <sup>-</sup> | 10 <sup>-6</sup> M          | [107]     |
| MAA                | EGDMA              | Camphorquinone    | 26.00 mg/g              | Cu <sup>2+</sup>             | -                           | [101]     |
| Allyl Thiourea     | EGDMA              | AIBN              | 11.00 mg/g              | NO <sub>3</sub> <sup>-</sup> | 10 <sup>-5</sup> M          | [20]      |
